# Supplementary material
Source: PubMed Central journal article supplement (PMC1874583)
Supplement: blood_blood-2006-07-034157_1.pdf [file blood_blood-2006-07-034157_1.pdf]

| Gene                                                        | Accession # | Relative expression<br><i>b</i> → <i>bd</i> vs. <i>bd</i> → <i>bd</i> |
|-------------------------------------------------------------|-------------|-----------------------------------------------------------------------|
| Guanylate nucleotide binding protein-2                      | NM_010260   | 11.1                                                                  |
| Guanylate nucleotide binding protein-2                      | BE197524    | 7.8                                                                   |
| Signal transducer and activator of transcription-1 (STAT-1) | NM_009283   | 6.1                                                                   |
| Membrane-spanning 4-domains, subfamily A, 4D                | NM_025658   | 6.0                                                                   |
| K12 protein precursor                                       | BC010462    | 5.6                                                                   |
| Interferon- $\gamma$ inducible GTPase                       | NM_021792   | 5.1                                                                   |
| Interferon- $\gamma$ induced GTPase                         | NM_019440   | 5.1                                                                   |
| Interferon- $\gamma$ activated gene 204                     | NM_008329   | 4.5                                                                   |
| Interferon- $\gamma$ activated gene 202B                    | NM_011940   | 4.2                                                                   |
| Interferon- $\gamma$ inducible protein-1                    | NM_008326   | 3.9                                                                   |
| CXCL9 (Mig)                                                 | NM_008599   | 3.8                                                                   |
| Interferon- $\gamma$ induced GTPase                         | NM_018738   | 3.4                                                                   |
| Solute carrier family 21 member-11                          | NM_023908   | 3.4                                                                   |
| Caspase-12                                                  | BG074173    | 3.2                                                                   |
| Signal transducer and activator of transcription-1 (STAT-1) | BM239586    | 3.0                                                                   |
