# Supplementary material
Source: PubMed Central journal article supplement (PMC1874583)

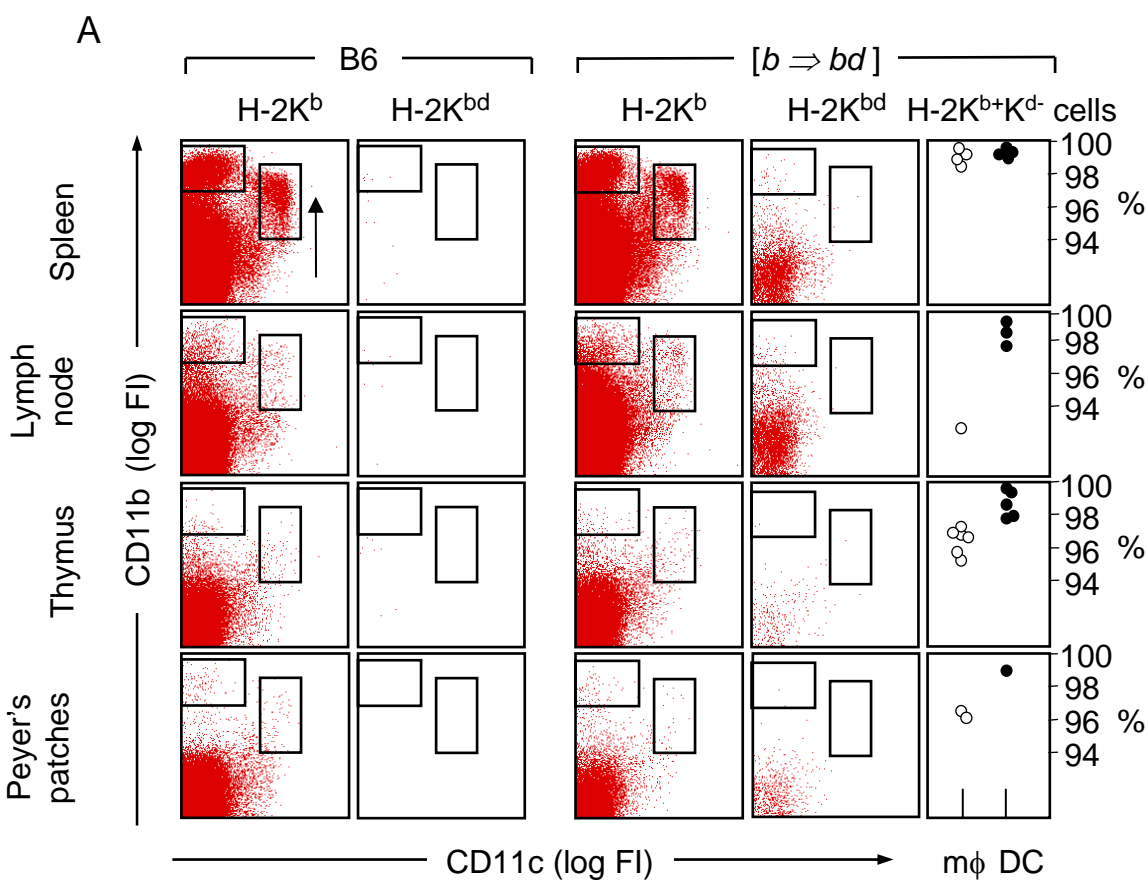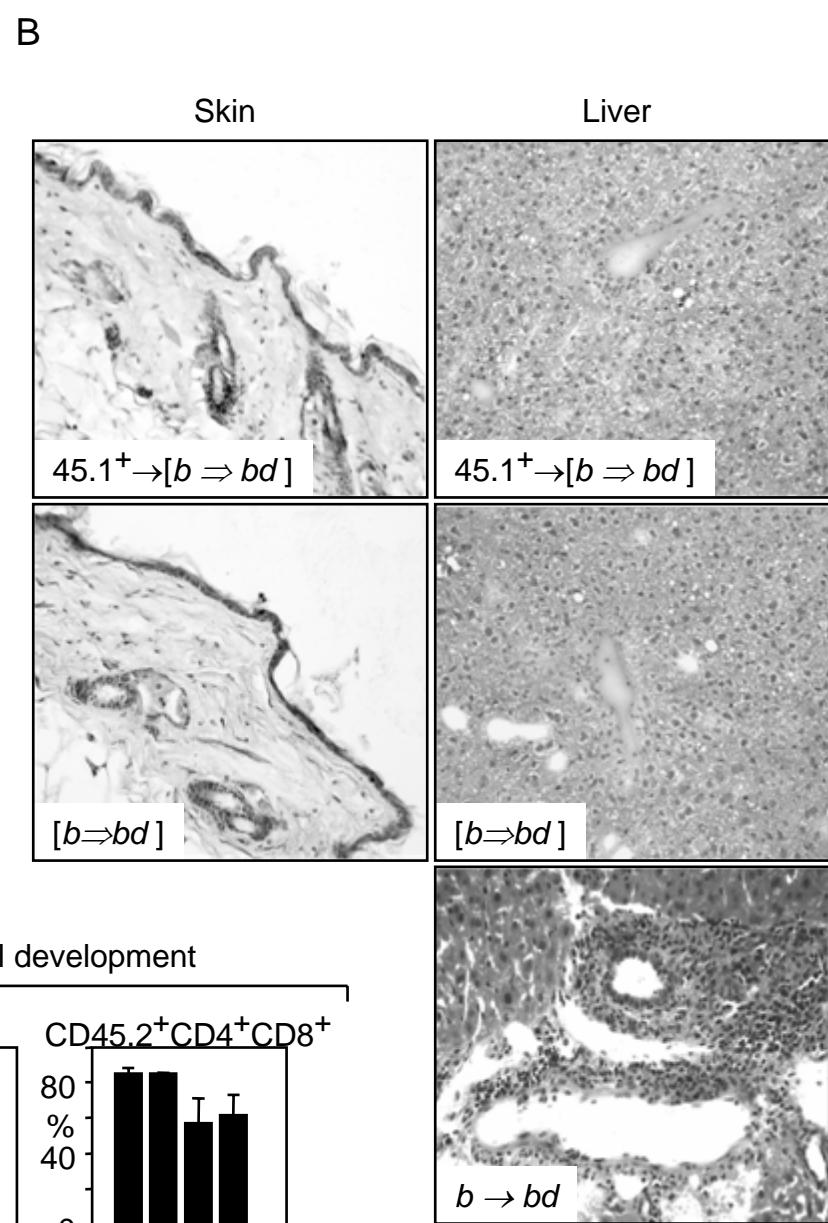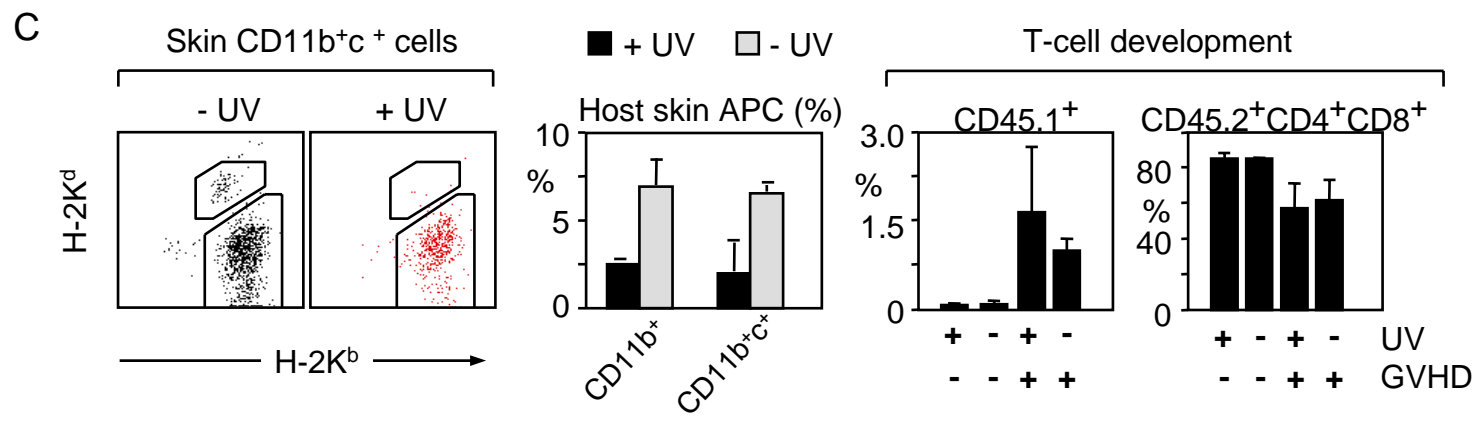

Supplement: blood_blood-2006-07-034157_3.pdf [file blood_blood-2006-07-034157_3.pdf]
